# Supplementary material for: Developmental alterations in DNA methylation during gametogenesis from primordial germ cells to sperm
Source: PubMed Central journal article supplement — iScience. 2022 Jan 19;25(2):103786. doi: 10.1016/j.isci.2022.103786 (PMC8819394; doi:10.1016/j.isci.2022.103786), 2022-01-19
Supplement: mmc1.pdf [file mmc1.pdf]

**iScience, Volume 25**

**Supplemental information**

**Developmental alterations in DNA  
methylation during gametogenesis  
from primordial germ cells to sperm**

**Millissia Ben Maamar, Daniel Beck, Eric Nilsson, John R. McCarrey, and Michael K. Skinner**

# **Developmental Alterations in DNA Methylation During Gametogenesis from Primordial Germ Cells to Sperm**

Millissia Ben Maamar<sup>1</sup>, Daniel Beck<sup>1</sup>, Eric Nilsson<sup>1</sup>, John R. McCarrey<sup>2</sup> and  
\*Michael K. Skinner<sup>1</sup>

**SUPPLEMENTAL MATERIAL**

## Supplemental Figure and Table Legends

**Supplemental Figure S1. The number of DMRs at different CpG densities.** All DMRs at a p-value threshold for top 1000 DMR are presented. The number of DMR at different CpG sites per 100 bp presented. **(A)** E13 primordial germ cells versus E16 prospermatogonia. **(B)** E16 prospermatogonia versus P10 spermatogonia. **(C)** P10 spermatogonia versus pachytene spermatocytes. **(D)** Pachytene spermatocytes versus round spermatids. **(E)** Round spermatids versus caput epididymal spermatozoa. **(F)** Caput epididymal spermatozoa versus cauda sperm.

**Supplemental Figure S2. The number of DMRs at different CpG densities.** All DMRs at a p-value threshold of  $1e-05$  are presented. **(A)** E13 primordial germ cells versus E16 prospermatogonia. **(B)** E16 prospermatogonia versus P10 spermatogonia. **(C)** P10 spermatogonia versus pachytene spermatocytes. **(D)** Pachytene spermatocytes versus round spermatids. **(E)** Round spermatids versus caput epididymal spermatozoa. **(F)** Caput epididymal spermatozoa versus cauda sperm.

**Supplemental Figure S3. The number of DMR at different lengths (kilobases).** All DMRs at a p-value threshold for top 1000 DMR are presented. The number of DMR at different length (kilobase) presented. **(A)** E13 primordial germ cells versus E16 prospermatogonia. **(B)** E16 prospermatogonia versus P10 spermatogonia. **(C)** P10 spermatogonia versus pachytene spermatocytes. **(D)** Pachytene spermatocytes versus

round spermatids. **(E)** Round spermatids versus caput epididymal spermatozoa. **(F)** Caput epididymal spermatozoa versus cauda sperm.

**Supplemental Figure S4. The number of DMR at different lengths.** All DMRs at a p-value threshold of  $1e-05$  are presented. **(A)** E13 primordial germ cells versus E16 prospermatogonia. **(B)** E16 prospermatogonia versus P10 spermatogonia. **(C)** P10 spermatogonia versus pachytene spermatocytes. **(D)** Pachytene spermatocytes versus round spermatids. **(E)** Round spermatids versus caput epididymal spermatozoa. **(F)** Caput epididymal spermatozoa versus cauda sperm.

**Supplemental Figure S5. Principal component analysis (PCA) of DMR genome-wide RPKM read depth at  $p < 1e-05$ .** **(A)** E13 primordial germ cells versus E16 prospermatogonia. **(B)** E16 prospermatogonia versus P10 spermatogonia. **(C)** P10 spermatogonia versus pachytene spermatocytes. **(D)** Pachytene spermatocytes versus round spermatids. **(E)** Round spermatids versus caput epididymal spermatozoa. **(F)** Caput epididymal spermatozoa versus cauda sperm.

**Supplemental Figure S6. Top 100 developmental stage methylation sites read depth (RPKM) comparisons.** **(A)** Caput spermatozoa top 100 sites, **(B)** Round spermatid top 100 sites, **(C)** Pachytene spermatocyte top 100 sites, **(D)** Spermatozoa top 100 sites, **(E)** Caput spermatozoa top 100 sites, and **(F)** Primordial germ cell top 100 sites.

**Supplemental Figure S7. DMR associated gene pathways.** KEGG gene pathways: PGC versus E16 prospermatogonia, prospermatogonia versus spermatogonia, spermatogonia versus pachytene, pachytene versus round spermatids, round spermatids versus caput, caput versus cauda. The KEGG pathway number, name and number of associated genes in brackets.

**Supplemental Figure S8. WGCNA dendrogram for the different modules.** The dendrogram height versus colored module is presented for all the modules. This figure shows how the genomic windows cluster into modules. The genomic windows are split into manageable sub-groups prior to clustering to keep computational requirements low.

**Supplemental Figure S9. WGCNA module DNA methylation site chromosomal locations.** Each module DNA methylation sites are presented on the chromosomal plot as a red arrowhead. The chromosome number and size of the chromosome (Mb) is presented. Modules are (A) black, (B) cyan, (C) green yellow, (D) grey, (E) grey 60, (F) light cyan, (G) magenta, (H) midnight blue, (I) pink, (J) purple, (K) red, (L) salmon, (M) tan. Blue, brown and turquoise not presented due to high number of methylation sites.

**Supplemental Figure S10. WGCNA module DNA methylation site overlap with DMRs at various developmental stage comparisons.** The color modules compared to specific developmental stage comparisons for DMR overlap with module DNA methylation sites are presented.

**Supplemental Table S1. DMR site list PGC versus prospermatogonia top 1000 DMR.**

DMR name, chromosome, start, stop, length, number signature windows, minimum p-value, max log-fold change, CpG number, CpG density, gene annotation, and gene category are presented.

**Supplemental Table S2. DMR site list prospermatogonia versus spermatogonia top**

**1000 DMR.** DMR name, chromosome, start, stop, length, number signature windows, minimum p-value, max log-fold change, CpG number, CpG density, gene annotation, and gene category are presented.

**Supplemental Table S3. DMR site list spermatogonia versus pachytene top 1000**

**DMR.** DMR name, chromosome, start, stop, length, number signature windows, minimum p-value, max log-fold change, CpG number, CpG density, gene annotation, and gene category are presented.

**Supplemental Table S4. DMR site list pachytene versus round spermatid top 1000**

**DMR.** DMR name, chromosome, start, stop, length, number signature windows, minimum p-value, max log-fold change, CpG number, CpG density, gene annotation, and gene category are presented.

**Supplemental Table S5. DMR site list round spermatid versus caput spermatozoa**

**top 1000 DMR.** DMR name, chromosome, start, stop, length, number signature windows,

minimum p-value, max log-fold change, CpG number, CpG density, gene annotation, and gene category are presented.

**Supplemental Table S6. DMR site list caput versus cauda top 1000 DMR.** DMR name, chromosome, start, stop, length, number signature windows, minimum p-value, max log-fold change, CpG number, CpG density, gene annotation, and gene category are presented.

**Supplemental Table S7. DMR overlap with Red module DNA methylation sites for prospermatogonia stage.** The 451 DMRs overlapped were used to identify DMR associated genes, Supplemental Figure S7, and used for a network analysis. DMR name, chromosomal site, start and stop sites, gene annotation and gene category are presented.

# Supplemental Figure S1

## A E13 Primordial Germ Cells vs E16 Prospermatogonia

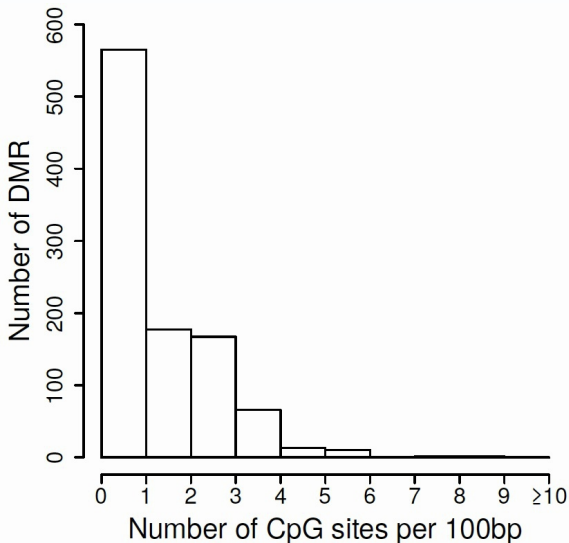

## B E16 Prospermatogonia vs P10 Spermatogonia

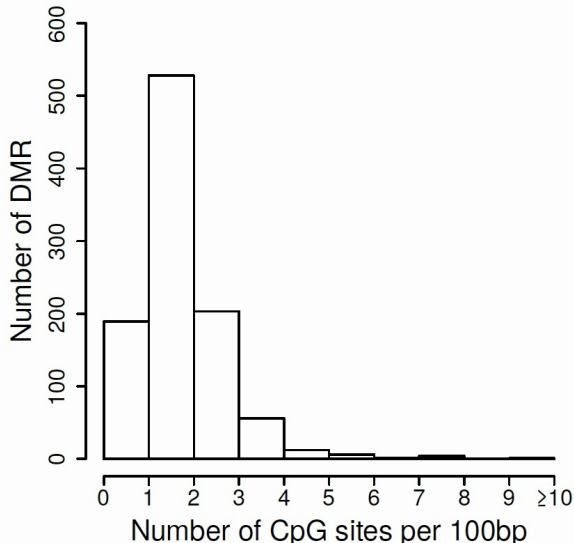

## C P10 Spermatogonia vs Pachytene Spermatocytes

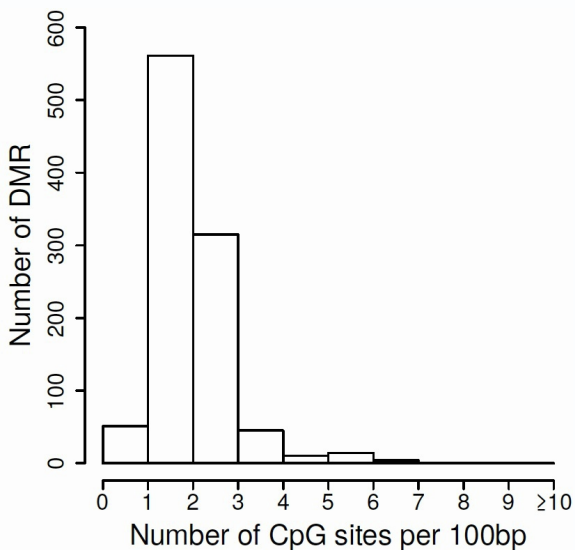

## D Pachytene Spermatocytes vs Round Spermatids

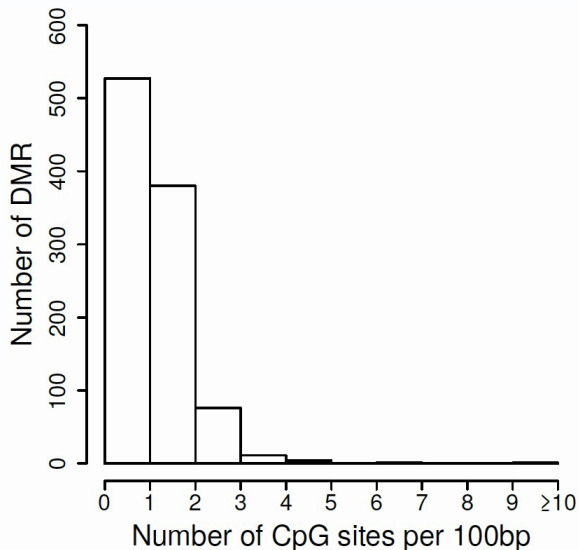

## E Round Spermatids vs Caput Epididymal Spermatozoa

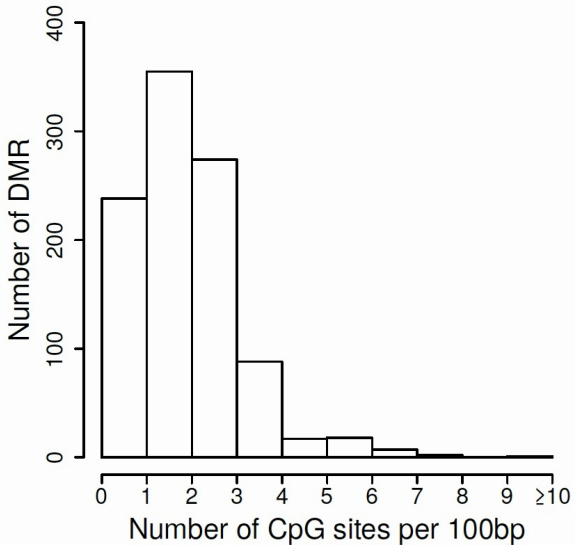

## F Caput Epididymal Spermatozoa vs Cauda Sperm

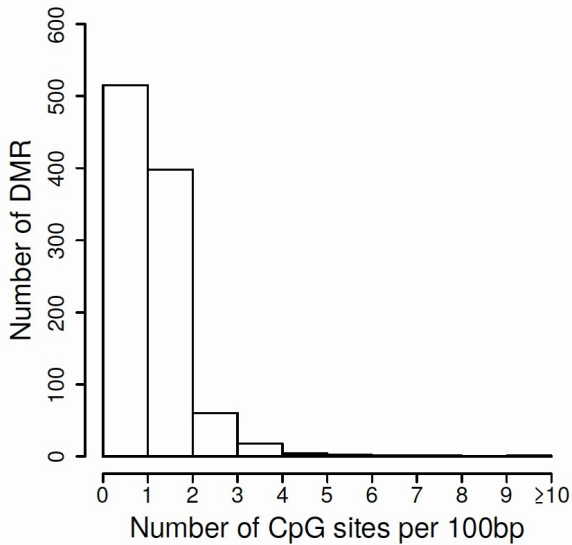



Supplemental Figure S2

**A** E13 Primordial Germ Cells vs E16 Prospermatogonia

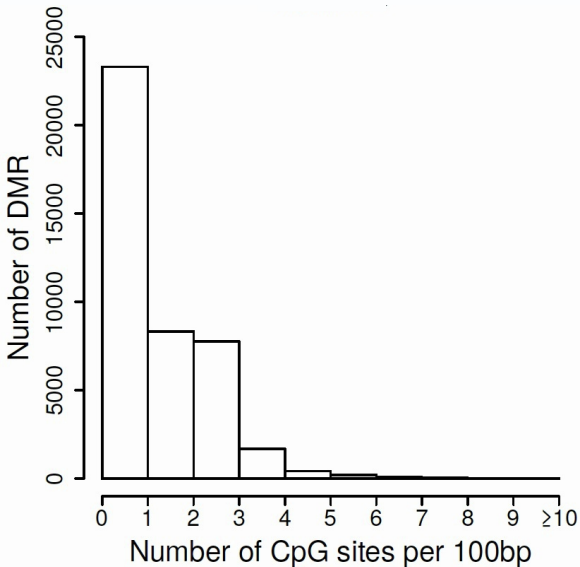

**B** E16 Prospermatogonia vs P10 Spermatogonia

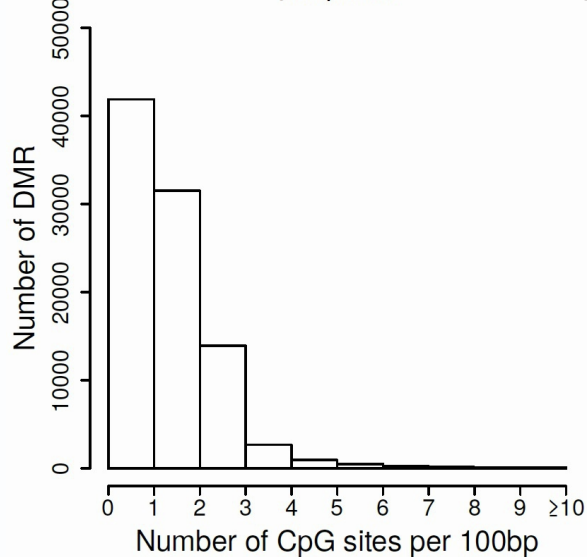

**C** P10 Spermatogonia vs Pachytene Spermatocytes

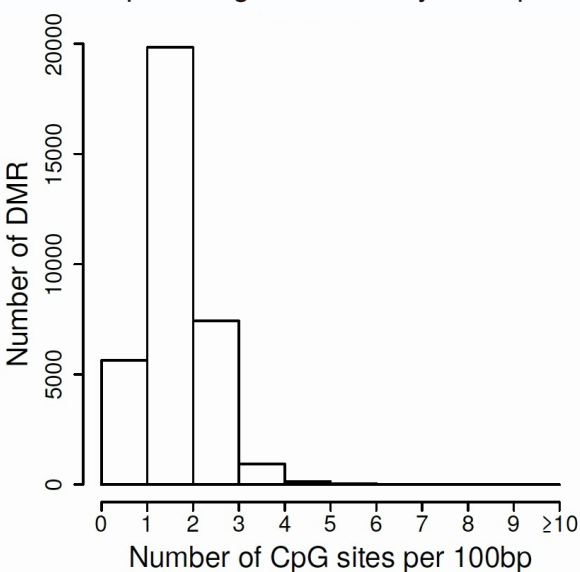

**D** Pachytene Spermatocytes vs Round Spermatids

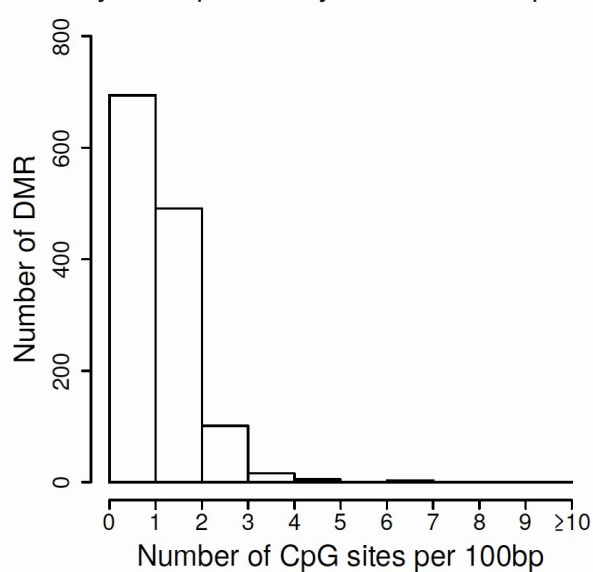

**E** Round Spermatids vs Caput Epididymal Spermatozoa

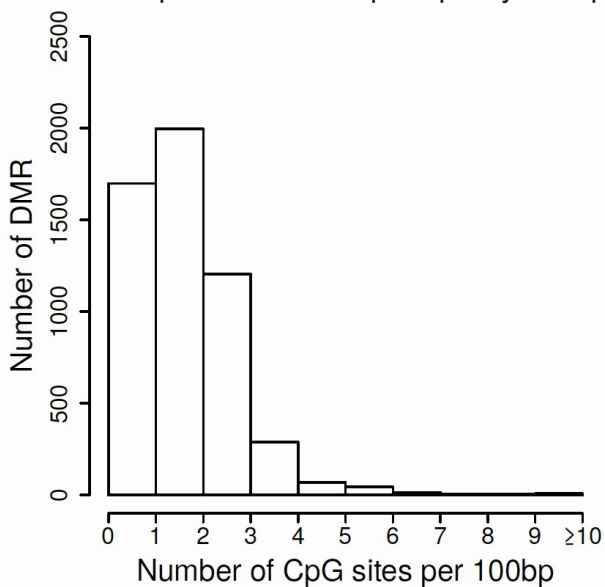

**F** Caput Epididymal Spermatozoa vs Cauda Spermatozoa

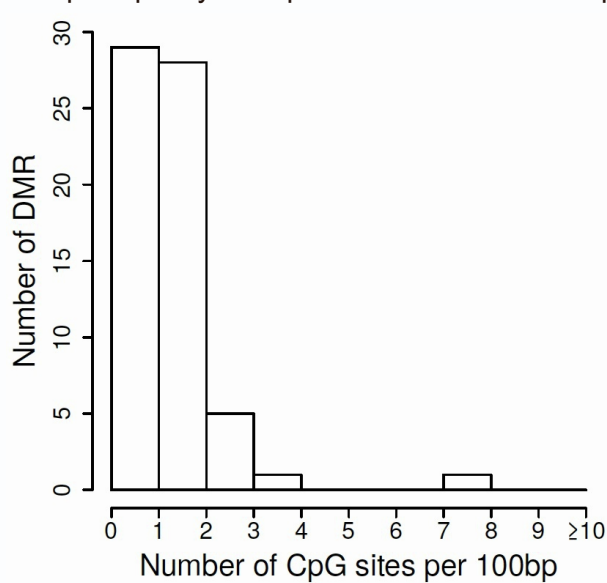

# Supplemental Figure S3

## A E13 Primordial Germ Cells vs E16 Prospermatogonia

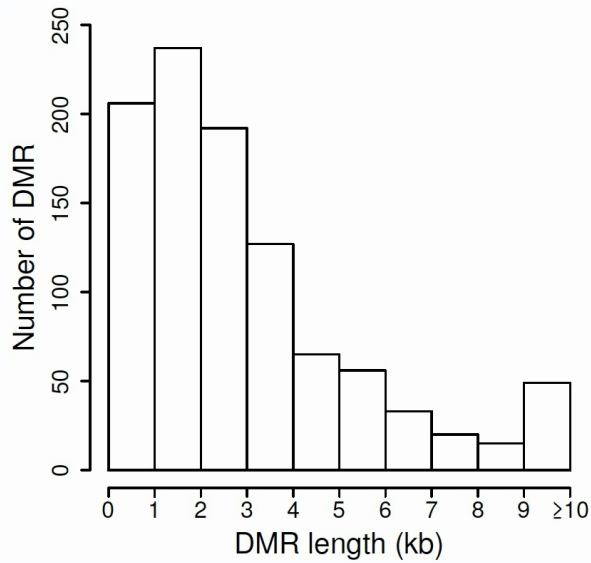

## B E16 Prospermatogonia vs P10 Spermatogonia

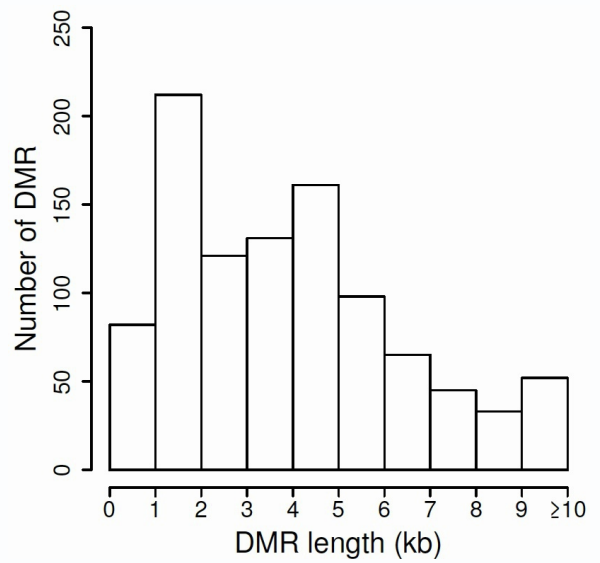

## C P10 Spermatogonia vs Pachytene Spermatocytes

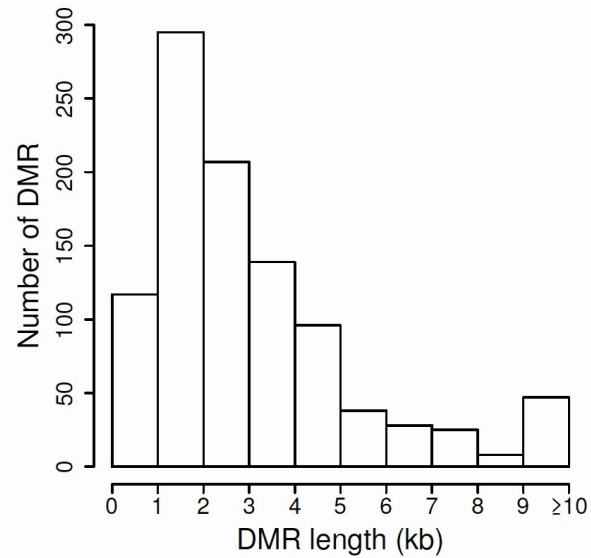

## D Pachytene Spermatocytes vs Round Spermatids

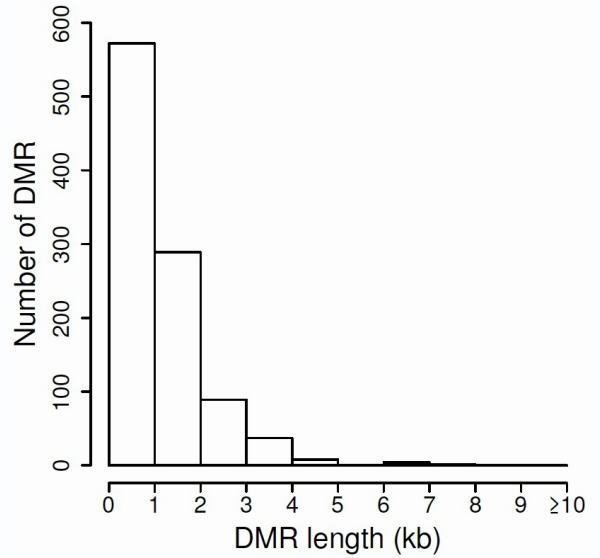

## E Round Spermatids vs Caput Epididymal Spermatozoa

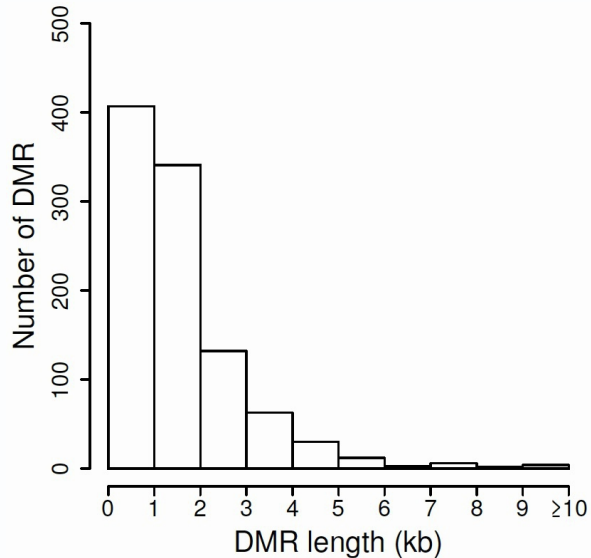

## F Caput Epididymal Spermatozoa vs Cauda Spermatozoa

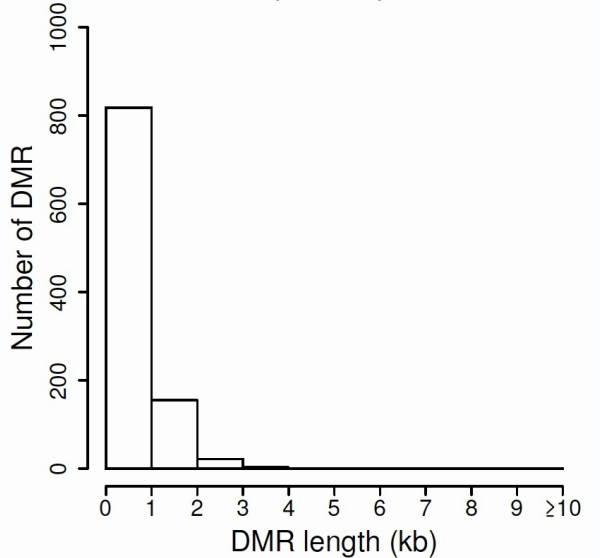

# Supplemental Figure S4

## A E13 Primordial Germ Cells vs E16 Prospermatogonia

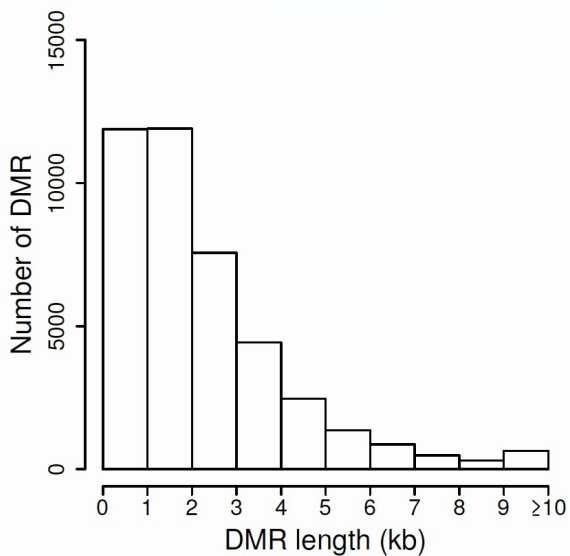

## B E16 Prospermatogonia vs P10 Spermatogonia

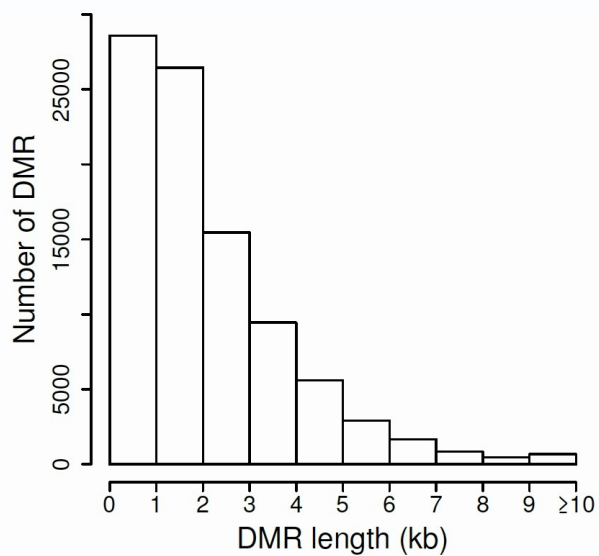

## C P10 Spermatogonia vs Pachytene Spermatocytes

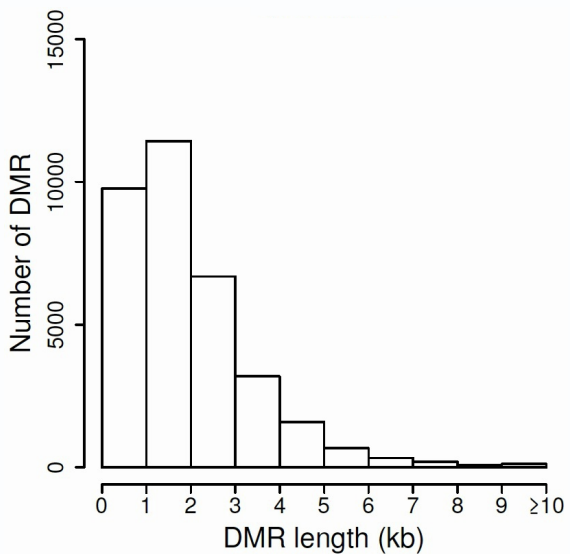

## D Pachytene Spermatocytes vs Round Spermatids

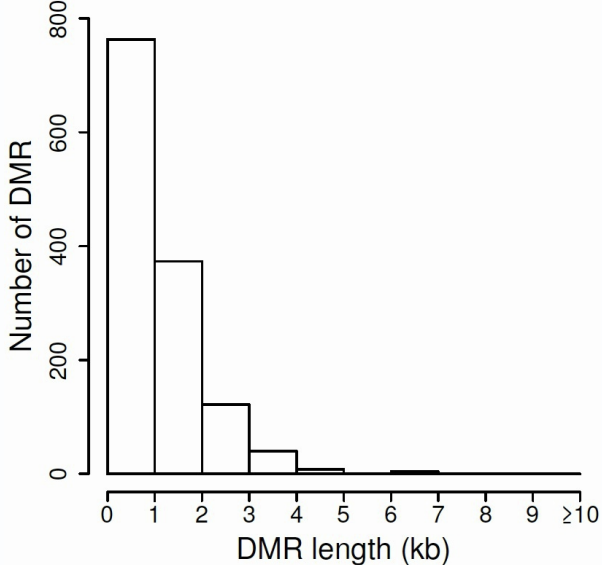

## E Round Spermatids vs Caput Epididymal Spermatozoa

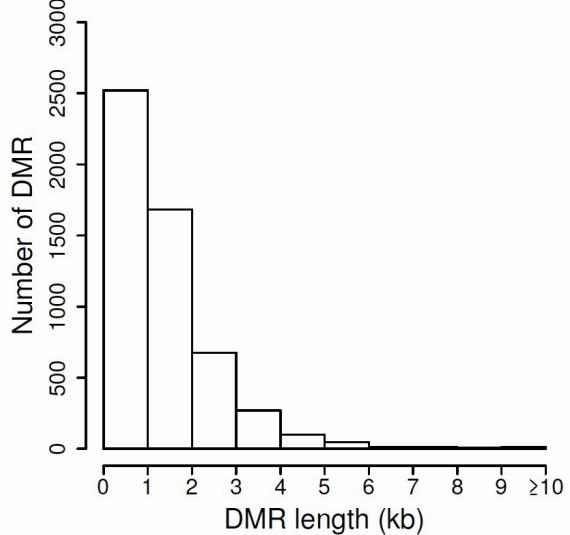

## F Caput Epididymal Spermatozoa vs Cauda Sperm

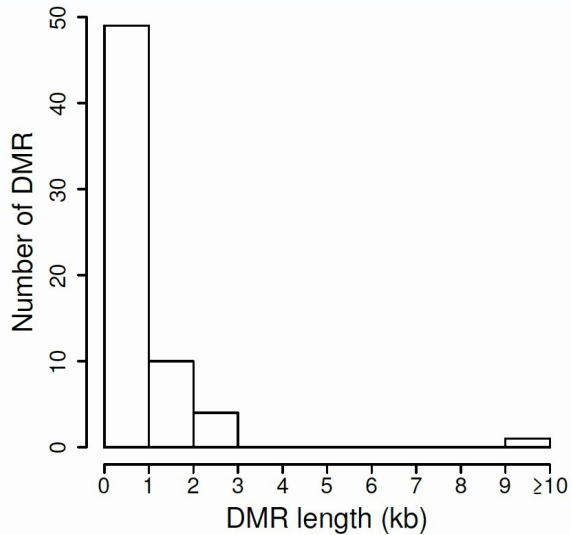

Supplemental Figure S5 (Color)

**A** E13 Primordial Germ Cells vs E16 Prospermatogonia

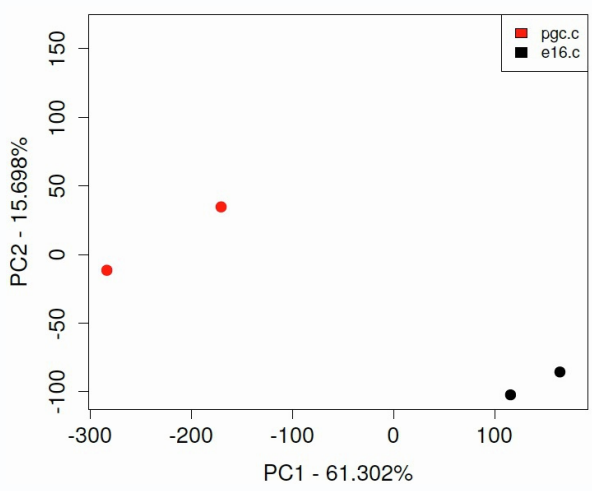

**B** E16 Prospermatogonia vs P10 Spermatogonia

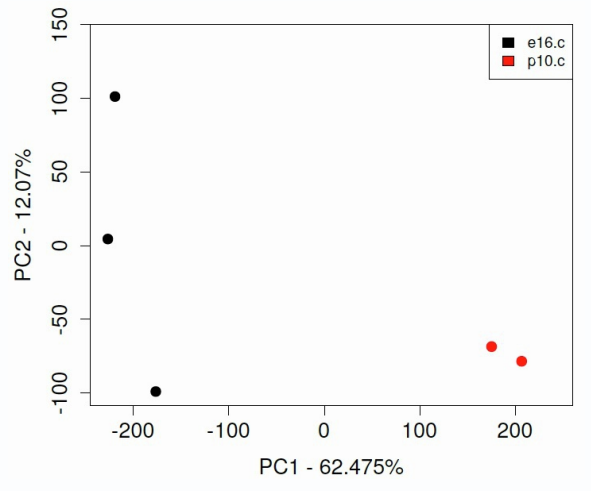

**C** P10 Spermatogonia vs Pachytene Spermatocytes

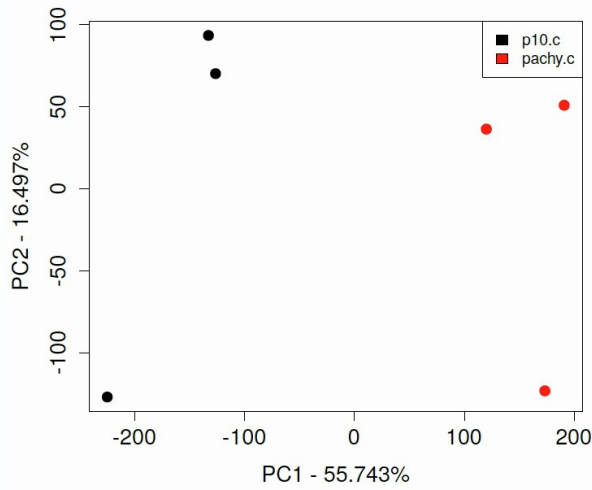

**D** Pachytene Spermatocytes vs Round Spermatids

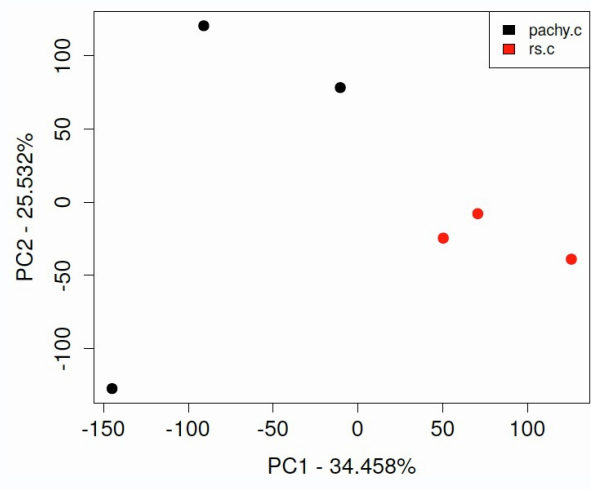

**E** Round Spermatids vs Caput Epididymal Spermatozoa

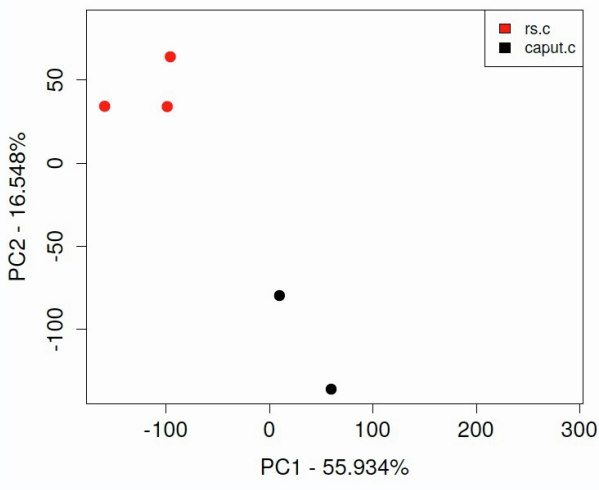

**F** Caput Epididymal Spermatozoa vs Cauda Spermatozoa

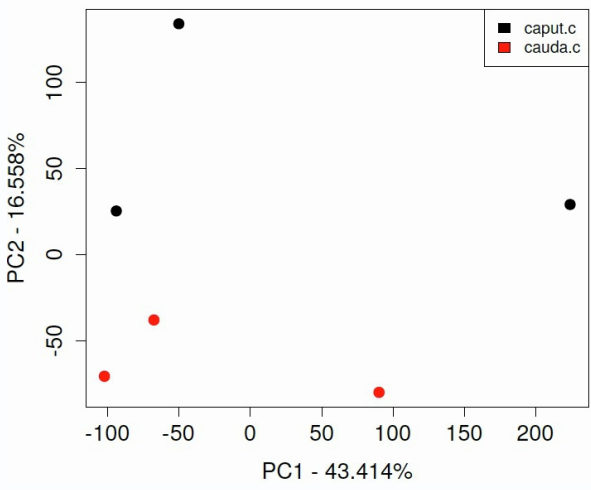

Top 100 Developmental Stage Methylation Sites Read Depth (RPKM) Comparisons

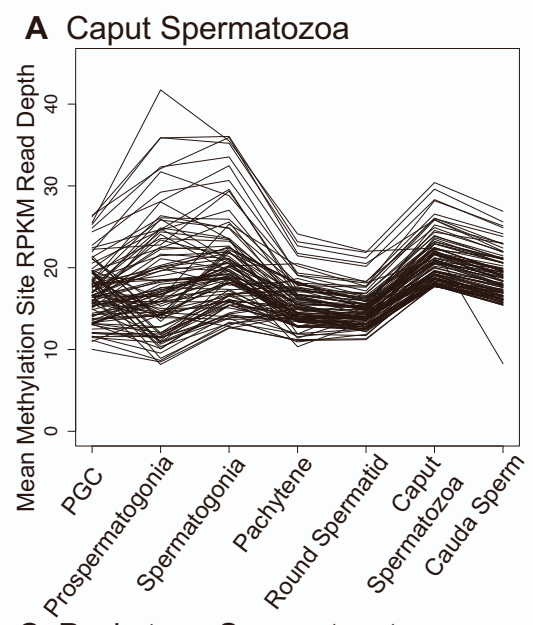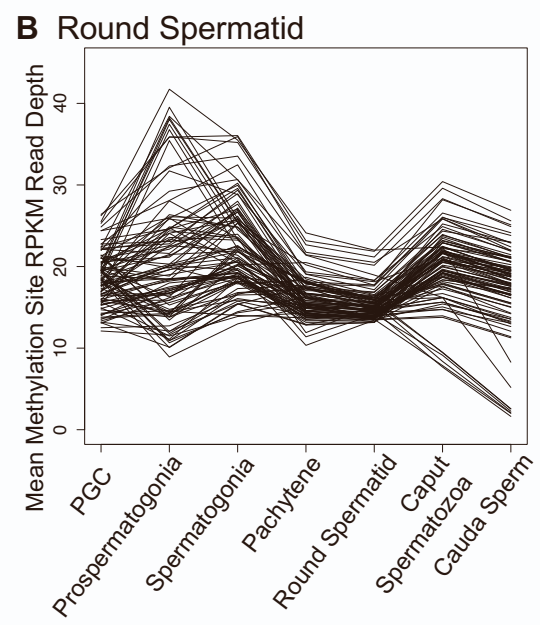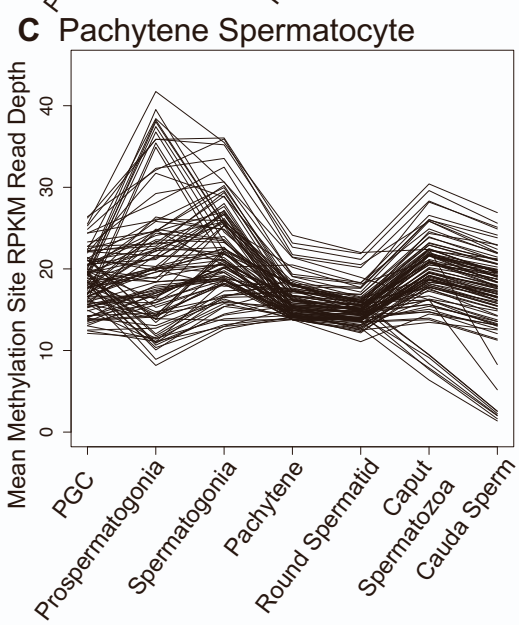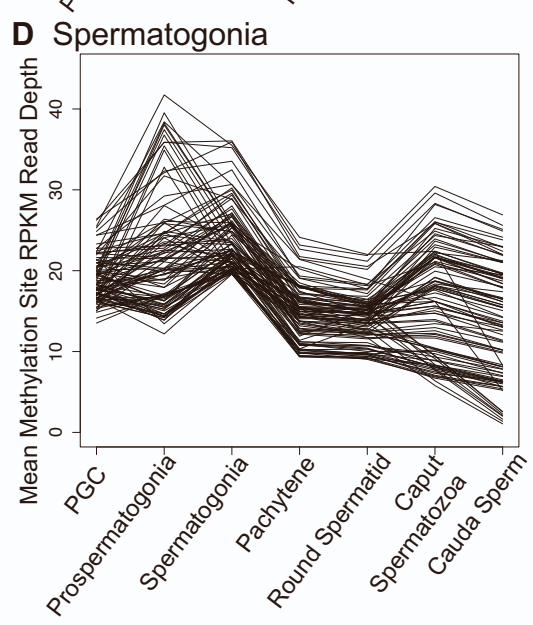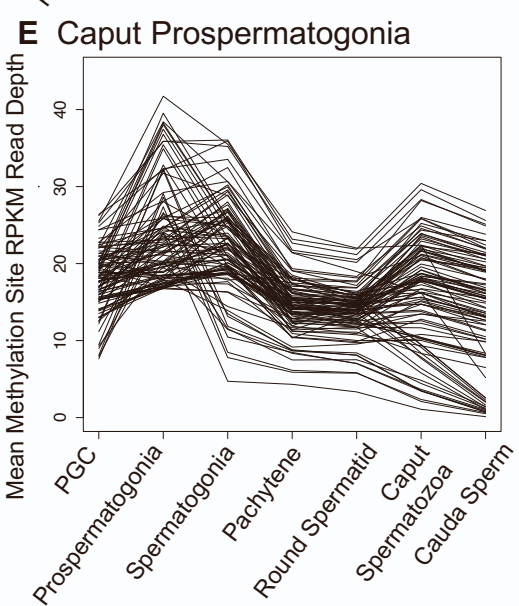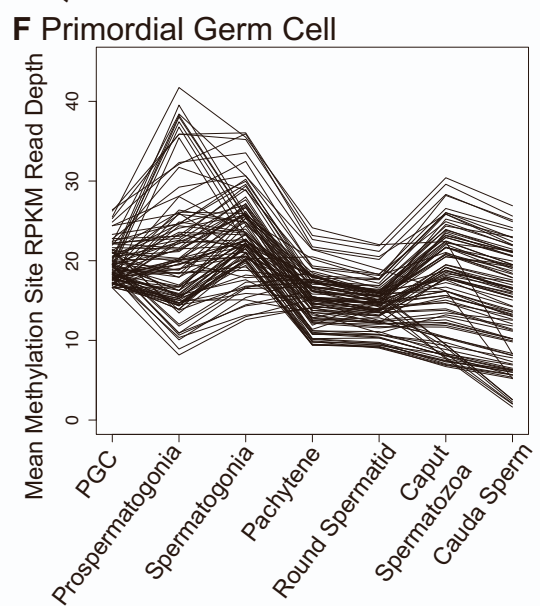

## Supplemental Figure S7

### DMR Associated Gene Pathways

#### KEGG Gene Pathways

##### **PGC vs. Prospermatogonia**

rno01100 Metabolic pathways (rat) (35)  
rno04740 Olfactory transduction (rat) (20)  
rno05200 Pathways in cancer (rat) (18)  
rno05165 Human papillomavirus infection (rat) (14)  
rno04934 Cushing syndrome (rat) (10)

##### **Prospermatogonia vs. Spermatogonia**

rno04740 Olfactory transduction (rat) (29)  
rno01100 Metabolic pathways (rat) (20)  
rno04080 Neuroactive ligand-receptor interaction (rat) (9)  
rno05170 Human immunodeficiency virus 1 infection (rat) (9)  
rno04010 MAPK signaling pathway (rat) (8)

##### **Spermatogonia vs. Pachytene**

rno01100 Metabolic pathways (rat) (23)  
rno05200 Pathways in cancer (rat) (18)  
rno05165 Human papillomavirus infection (rat) (15)  
rno04151 PI3K-Akt signaling pathway (rat) (14)  
rno04360 Axon guidance (rat) (13)

##### **Pachytene vs. Round Spermatids**

rno01100 Metabolic pathways (rat) (27)  
rno05200 Pathways in cancer (rat) (17)  
rno04151 PI3K-Akt signaling pathway (rat) (17)  
rno04010 MAPK signaling pathway (rat) (14)  
rno05165 Human papillomavirus infection (rat) (13)

##### **Round Spermatids vs. Caput**

rno01100 Metabolic pathways (rat) (23)  
rno05165 Human papillomavirus infection (rat) (19)  
rno05163 Human cytomegalovirus infection (rat) (18)  
rno04151 PI3K-Akt signaling pathway (rat) (18)  
rno05200 Pathways in cancer (rat) (18)

##### **Caput vs. Cauda**

rno01100 Metabolic pathways (rat) (42)  
rno05205 Proteoglycans in cancer (rat) (14)  
rno04360 Axon guidance (rat) (13)  
rno05200 Pathways in cancer (rat) (12)  
rno04740 Olfactory transduction (rat) (12)



Cluster Dendrogram

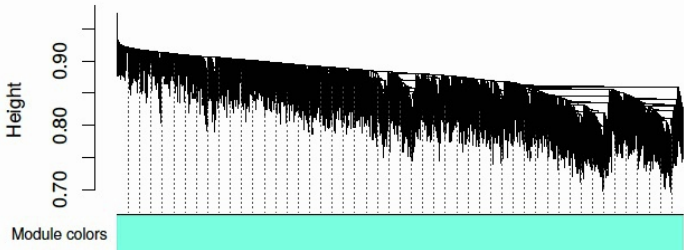

Cluster Dendrogram

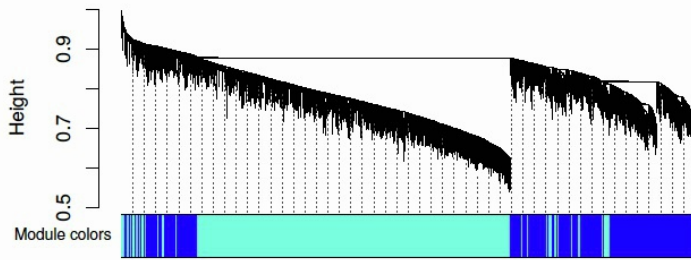

Cluster Dendrogram

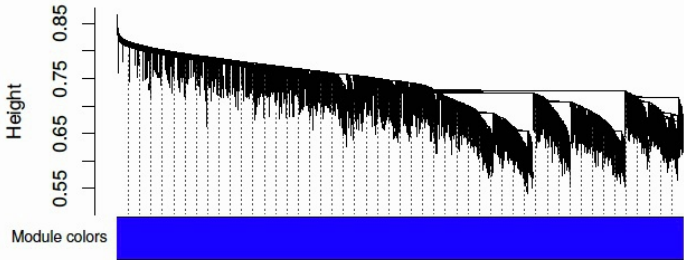

Cluster Dendrogram

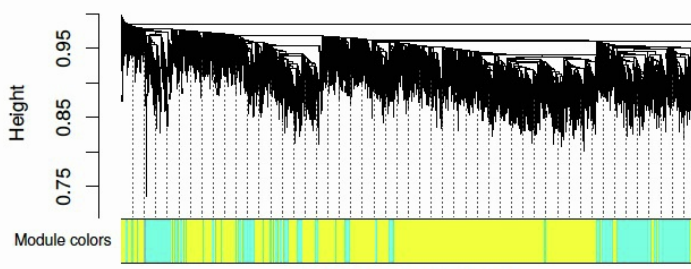

Cluster Dendrogram

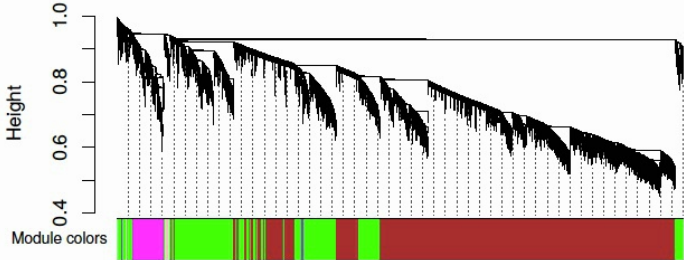

Cluster Dendrogram

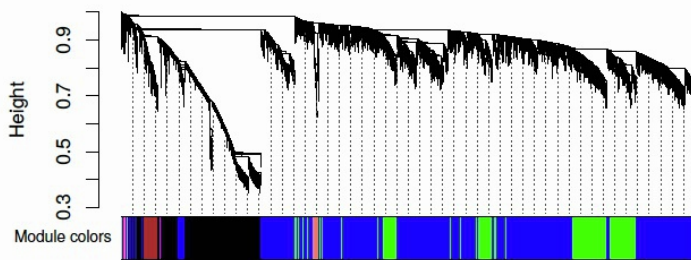

Cluster Dendrogram

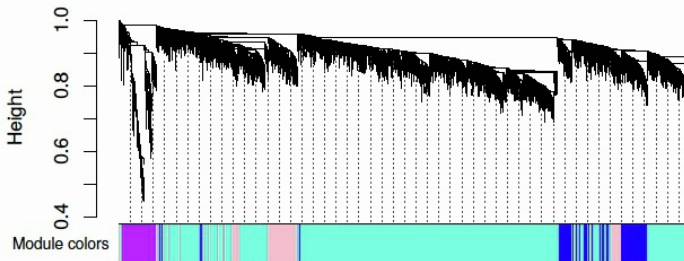

Cluster Dendrogram

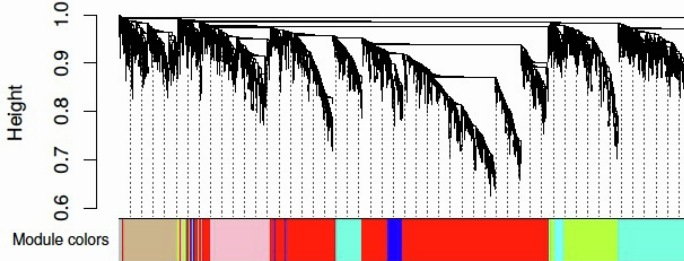

(A) Black

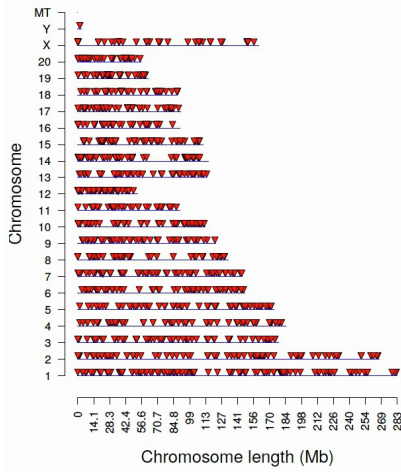

(B) Cyan

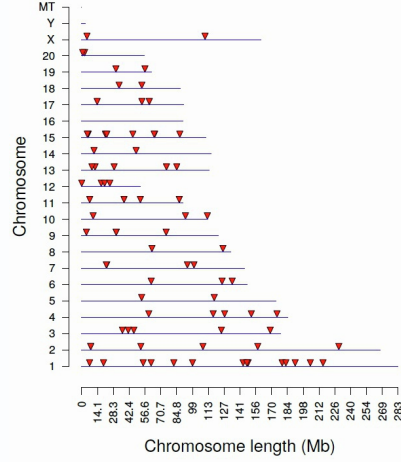

(C) Green Yellow

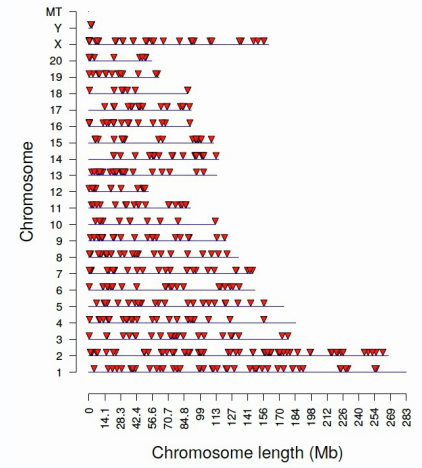

(D) Grey

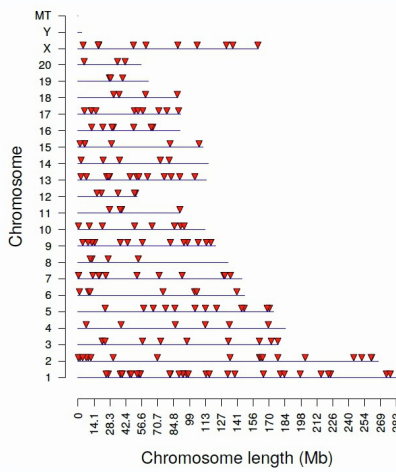

(E) Grey 60

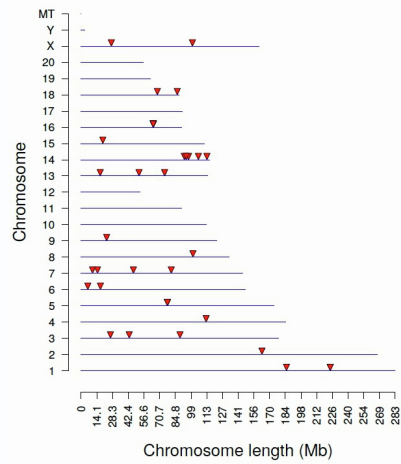

(F) Light Cyan

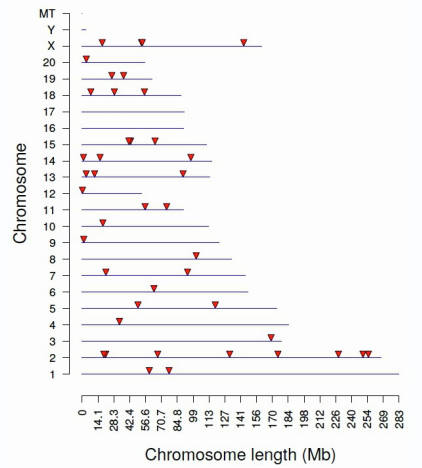

(G) Magenta

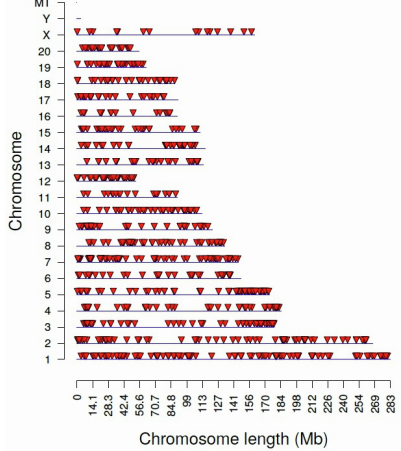

(H) Midnight Blue

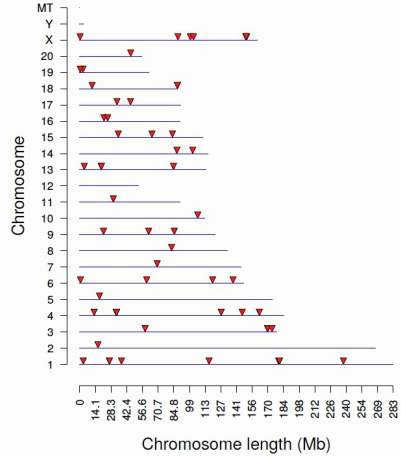

(I) Pink

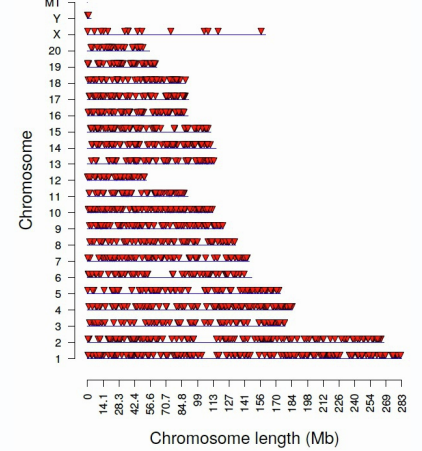

(J) Purple

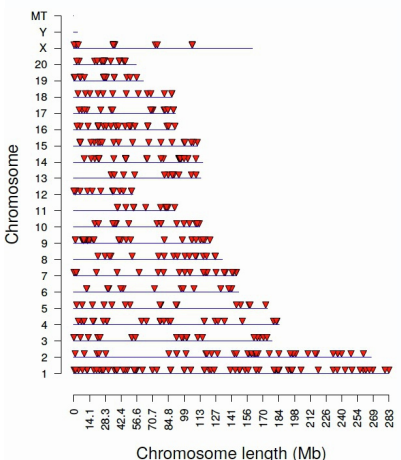

(K) Red

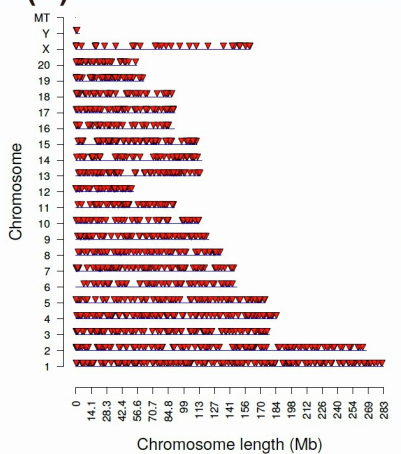

(L) Salmon

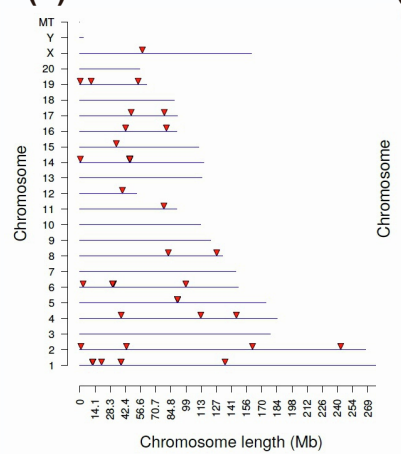

(M) Tan

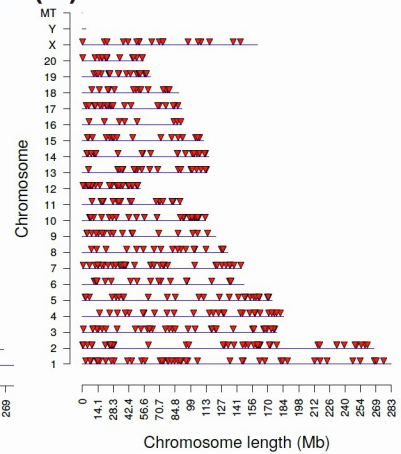



### WGCNA DNA Methylation Modules Sites Overlap with DMRs from Various Developmental Stage Comparisons

|               | PGC vs.<br>E16 | E16 vs.<br>P10 | P10 vs.<br>Pachy | Pachy vs.<br>RS | RS vs.<br>Caput | Caput vs.<br>Cauda |
|---------------|----------------|----------------|------------------|-----------------|-----------------|--------------------|
| Midnight Blue | 18             | 1              | 0                | 0               | 0               | 0                  |
| Salmon        | 31             | 0              | 0                | 0               | 17              | 0                  |
| Grey 60       | 2              | 0              | 0                | 0               | 0               | 0                  |
| Blue          | 668            | 6992           | 533              | 21              | 904             | 17                 |
| Turquoise     | 1833           | 11917          | 379              | 60              | 12              | 0                  |
| Magenta       | 138            | 6              | 5                | 0               | 13              | 0                  |
| Brown         | 435            | 2290           | 606              | 1               | 704             | 0                  |
| Green         | 26             | 31             | 141              | 0               | 315             | 0                  |
| Red           | 604            | 451            | 84               | 3               | 9               | 0                  |
| Pink          | 90             | 1              | 191              | 3               | 2               | 0                  |
| Purple        | 5              | 1              | 15               | 0               | 1               | 0                  |
| Light Cyan    | 0              | 0              | 7                | 0               | 0               | 0                  |
| Yellow        | 23             | 144            | 210              | 11              | 0               | 0                  |
| Black         | 239            | 505            | 1158             | 3               | 70              | 2                  |
| Tan           | 0              | 95             | 71               | 0               | 0               | 0                  |
| Cyan          | 0              | 24             | 1                | 0               | 0               | 0                  |
| Green Yellow  | 122            | 116            | 3                | 2               | 1               | 0                  |
| Grey          | 0              | 0              | 0                | 0               | 0               | 0                  |
